# Supplementary material for: Characterization of NLRP3 Inflammasome Activation in the Onset of Diabetic Retinopathy
Source: MDPI journal article supplement (doi:10.3390/ijms232214471), 2022-11-21
Supplement: s1 [file s1]

**Table S1: Full donor history**

|           | Donor ID | Sclera | Sex | Age | Ethnicity  | Post mortem delay (h) | Cause of Death              | Systemic disease | Eye disease/ surgery                                               | Experiment used       |
|-----------|----------|--------|-----|-----|------------|-----------------------|-----------------------------|------------------|--------------------------------------------------------------------|-----------------------|
| DR (n=4)  | 19-143   | N      | F   | 64  | Polynesian | 24+                   | Brain hemorrhage            | DM               | DR                                                                 | WB, Luminex           |
|           |          |        |     |     |            |                       |                             |                  | DR                                                                 | WB, Luminex           |
|           | 21-004   | N      | M   | 84  | Indian     | 13.5                  | Pneumonia, brain hemorrhage | DM               | DR, Pseudophakic                                                   | WB, Luminex           |
|           |          |        |     |     |            |                       |                             |                  | DR, Pseudophakic                                                   | WB, Luminex           |
|           | 21-029   | N      | M   | 59  | Indian     | 24+                   | Cardiac arrest              | DM               | Non-proliferative DR, primary open angle glaucoma, laser treatment | WB, Luminex           |
|           |          |        |     |     |            |                       |                             |                  | -                                                                  | WB, Luminex           |
|           | 19-081   | Y      | F   | 54  | Māori      | 8                     | Pneumonia                   | -                | Diabetic retinopathy, bilateral cataract surgery, vitrectomy       | WB, IHC, H&E, Luminex |
|           |          |        |     |     |            |                       |                             |                  |                                                                    | WB, IHC, H&E, Luminex |
| DM (n=10) | 19-100   | Y      | F   | 75  | Caucasian  | 24                    | Pneumonia                   | DM               | Bilateral pseudophakia                                             | WB, IHC, H&E, Luminex |
|           |          |        |     |     |            |                       |                             |                  |                                                                    | WB, IHC, H&E, Luminex |
|           | 19-144   | N      | M   | 69  | Indian     | 12                    | Stroke                      | DM               | -                                                                  | WB, Luminex           |
|           |          |        |     |     |            |                       |                             |                  | Pseudophakic                                                       | WB, Luminex           |
|           | 19-181   | N      | F   | 68  | Japanese   | 24+                   | Subarachnoid hemorrhage     | DM               | -                                                                  | WB, Luminex           |
|           |          |        |     |     |            |                       |                             |                  | -                                                                  | WB, Luminex           |
|           | 19-182   | N      | F   | 57  | Caucasian  | 24+                   | Intracranial hemorrhage     | DM               | -                                                                  | WB, Luminex           |
|           |          |        |     |     |            |                       |                             |                  | -                                                                  | WB, Luminex           |
|           | 20-070   | N      | F   | 82  | Caucasian  | 24+                   | Sepsis                      | DM               | -                                                                  | WB, Luminex           |
|           |          |        |     |     |            |                       |                             |                  | -                                                                  | WB, Luminex           |
|           | 20-071   | N      | M   | 71  | Indian     | 24+                   | Pneumonia                   | DM               | -                                                                  | WB, Luminex           |
|           |          |        |     |     |            |                       |                             |                  | -                                                                  | WB, Luminex           |
|           | 20-078   | N      | M   | 58  | Caucasian  | 24+                   | Cardiac arrest              | DM               | -                                                                  | WB, Luminex           |
|           |          |        |     |     |            |                       |                             |                  | -                                                                  | WB, Luminex           |
|           | 20-079   | N      | M   | 82  | Caucasian  | 24+                   | Pneumonia                   | DM               | -                                                                  | WB, Luminex           |
|           |          |        |     |     |            |                       |                             |                  | -                                                                  | WB, Luminex           |
|           | 21-084   | N      | F   | 59  | Caucasian  | 24+                   | Renal failure               | DM               | Pseudophakic                                                       | WB, Luminex           |

|            |        |   |   |    |           |      |                                 |    |              |             |
|------------|--------|---|---|----|-----------|------|---------------------------------|----|--------------|-------------|
|            |        |   |   |    |           |      |                                 |    | Pseudophakic | WB, Luminex |
|            | 21-115 | N | M | 32 | Caucasian | 24+  | Cerebrovascular accident/stroke | DM | -            | WB, Luminex |
|            |        |   |   |    |           |      |                                 |    | -            | WB, Luminex |
| CTL (n=10) | 19-117 | N | F | 59 | Samoan    | 24+  | Lymphoma, renal failure         | -  | -            | WB, Luminex |
|            |        |   |   |    |           |      |                                 |    | -            | WB, Luminex |
|            | 21-060 | N | M | 68 | Caucasian | 24+  | Metastatic prostate cancer      | -  | -            | WB          |
|            |        |   |   |    |           |      |                                 |    | -            | WB          |
|            | 21-086 | N | M | 68 | -         | 21   | Hypoxic-ischemic encephalopathy | -  | -            | WB, Luminex |
|            |        |   |   |    |           |      |                                 |    | -            | WB, Luminex |
|            | 19-180 | N | F | 60 | Caucasian | 24+  | Subarachnoid hemorrhage         | -  | -            | WB, Luminex |
|            |        |   |   |    |           |      |                                 |    | -            | WB, Luminex |
|            | 20-176 | N | F | 78 | Caucasian | 24+  | Subarachnoid hemorrhage         | -  | -            | WB, Luminex |
|            |        |   |   |    |           |      |                                 |    | -            | WB, Luminex |
|            | 19-179 | N | M | 58 | Caucasian | 24+  | Intracranial hemorrhage         | -  | -            | WB, Luminex |
|            |        |   |   |    |           |      |                                 |    | -            | WB, Luminex |
|            | 18-149 | N | F | 80 | Caucasian | 24+  | Heart failure                   | -  | Pseudophakic | WB, Luminex |
|            |        |   |   |    |           |      |                                 |    | Pseudophakic | WB, Luminex |
|            | 19-147 | N | M | 59 | Caucasian | 24+  | Aspiration pneumonia            | -  | -            | WB, Luminex |
|            |        |   |   |    |           |      |                                 |    | -            | WB, Luminex |
|            | 19-108 | Y | M | 73 | Caucasian | 6    | Myelodysplastic syndrome        | -  | -            | IHC, H&E    |
|            | 19-110 | Y | F | 69 | Caucasian | 17.5 | Pneumonia                       | -  | -            | IHC, H&E    |

N = no; Y = yes; M = male; F = female; CTL = control; DM = diabetes mellitus only without retinopathy; DR = diabetic retinopathy; WB = Western Blotting, IHC = immunohistochemistry, H&E = Hematoxylin and Eosin

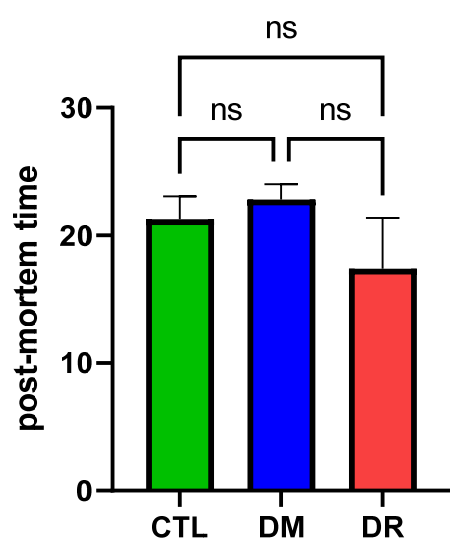

**Figure S1:** No significant difference was found between the post-mortem time between CTL, DM and DR; CTL = control; DM = diabetes mellitus only without retinopathy; DR = diabetic retinopathy.
